# Supplementary material for: Construction of 2D interwoven and 3D interpenetrated metal–organic frameworks of Zn(ii) by varying N,N′-donor spacers
Source: Royal Society of Chemistry journal article supplement (doi:10.1039/c3ce42454e), 2014-01-01

## Electronic Supplementary Information

### Construction of a 2D Interwoven and 3D Interpenetrated Metal-Organic Frameworks of Zn(II) by Varying N,N'-Donor Spacers

C. M. Nagaraja,<sup>\*a</sup> Bharat Ugale<sup>a</sup> and Anjana Chanthapally<sup>b</sup>

<sup>a</sup>Department of Chemistry, Indian Institute of Technology Ropar, Rupnagar 140001, Punjab, India.

<sup>b</sup>Department of Chemistry, National University of Singapore, 3 Science Drive 3, Singapore 117543

**Table S1.** Selected bond lengths (Å) and bond angles (°) in compound **1**.

|                           |          |                           |            |
|---------------------------|----------|---------------------------|------------|
| Zn1-O1                    | 1.953(5) | O1-Zn1-O2                 | 100.3(2)   |
| Zn1-O2                    | 1.969(5) | O1-Zn1-N1                 | 107.8(2)   |
| Zn1-N1                    | 2.017(6) | O1-Zn1-N2                 | 115.7(2)   |
| Zn1-N2                    | 2.022(6) | O2-Zn1-N1                 | 112.23(19) |
| Zn2-O3                    | 1.974(4) | O2-Zn1-N2                 | 107.1(2)   |
| Zn2-N3                    | 2.010(6) | N1-Zn1-N2                 | 113.2(2)   |
| Zn2-N4                    | 2.018(6) | O3-Zn2-N3                 | 109.33(19) |
| Zn2-O4 <sup>i</sup>       | 1.959(5) | O3-Zn2-N4                 | 110.23(19) |
| O4 <sup>i</sup> -Zn2-N4   | 111.2(2) | O3-Zn2-O4 <sup>i</sup>    | 97.73(19)  |
| Zn1-O1-C1                 | 112.8(4) | N3-Zn2-N4                 | 113.2(2)   |
| Zn1-O2-C7                 | 118.6(5) | O4 <sup>i</sup> -Zn2-N3   | 114.1(2)   |
| Zn2-O3-C6                 | 118.2(4) | Zn2-N3-C23 <sup>iii</sup> | 123.2(4)   |
| Zn2 <sup>ii</sup> -O4-C12 | 111.9(2) | Zn2-N3-C27 <sup>iii</sup> | 120.8(4)   |
| Zn1-N1-C13                | 122.5(4) | Zn2-N4-C28                | 121.6(4)   |
| Zn1-N1-C17                | 122.0(4) | Zn2-N4-C32                | 122.3(4)   |
| Zn1-N2-C18                | 121.1(4) | Zn1-N2-C22                | 121.3(4)   |

Symmetry codes: (i) x, -1+y, z; (ii) x, 1+y, z; (iii) 1+x, y, z

**Table S2.** Selected bond lengths (Å) and bond angles (°) in compound **2**.

|                     |            |                                      |           |
|---------------------|------------|--------------------------------------|-----------|
| Zn1-O1              | 1.9696(9)  | O1-Zn1-O1 <sup>i</sup>               | 104.29(4) |
| Zn1-N1              | 2.0438(11) | O1-Zn1-N1 <sup>i</sup>               | 98.93(4)  |
| Zn1-O1 <sup>i</sup> | 1.9696(9)  | O1 <sup>i</sup> -Zn1-N1              | 98.93(4)  |
| Zn1-N1 <sup>i</sup> | 2.0438(11) | N1-Zn1-N1 <sup>i</sup>               | 108.02(4) |
| O1W-H1A             | 0.81(3)    | O1 <sup>i</sup> -Zn1-N1 <sup>i</sup> | 124.48(4) |
| O1W-H1B             | 0.80(3)    | Zn1-O1-C1                            | 110.77(7) |
| O2W-H2A             | 0.88(3)    | Zn1-N1-C4                            | 121.52(8) |
| O2W-H2B             | 0.84(3)    | Zn1-N1-C8                            | 120.50(8) |
| O1-Zn1-N1           | 124.48(4)  |                                      |           |

Symmetry codes: (i) 1-x, y, 1/2-z

**Table S3.** Selected bond lengths (Å) and bond angles (°) in compound **3**.

|                        |           |                                      |           |
|------------------------|-----------|--------------------------------------|-----------|
| Zn1-O1                 | 1.933(2)  | O1-Zn1-N1 <sup>i</sup>               | 103.93(4) |
| Zn1-N1                 | 2.052(2)  | O1 <sup>i</sup> -Zn1-N1              | 103.93(4) |
| Zn1-O1 <sup>i</sup>    | 1.933(2)  | N1-Zn1-N1 <sup>i</sup>               | 99.95(4)  |
| Zn1-N1 <sup>i</sup>    | 2.052(2)  | O1 <sup>i</sup> -Zn1-N1 <sup>i</sup> | 123.95(4) |
| O1-Zn1-N1              | 123.95(4) | Zn1-O1-C1                            | 120.00(8) |
| O1-Zn1-O1 <sup>i</sup> | 103.19(4) | Zn1-N1-C4                            | 120.77(9) |
|                        |           | Zn1-N1-C8                            | 119.69(9) |

Symmetry codes: (i) 1-x, y, 3/2-z

**Table S4.** Selected bond lengths (Å) and bond angles (°) for compound **4**.

|                      |           |                          |            |
|----------------------|-----------|--------------------------|------------|
| Zn1-O1               | 2.360(2)  | O5-Zn2-O8 <sup>i</sup>   | 153.82(8)  |
| Zn1-O2               | 2.116(2)  | O6-Zn2-O7                | 138.02(9)  |
| Zn1-O3               | 2.019(2)  | O6-Zn2-N3                | 88.86(8)   |
| Zn1-O4               | 2.012(2)  | O6-Zn2-N4                | 90.88(8)   |
| Zn1-N1               | 2.151(3)  | O6-Zn2-O8 <sup>i</sup>   | 82.14(8)   |
| Zn1-N2               | 2.177(3)  | O7-Zn2-N3                | 86.89(9)   |
| Zn2-O5               | 2.035(2)  | O7-Zn2-N4                | 90.85(10)  |
| Zn2-O6               | 2.015(2)  | O7-Zn2-O8 <sup>i</sup>   | 55.89(8)   |
| Zn2-O7               | 2.060(2)  | N3-Zn2-N4                | 176.32(10) |
| Zn2-N3               | 2.154(3)  | O8 <sup>i</sup> -Zn2-N3  | 84.73(9)   |
| Zn2-N4               | 2.151(3)  | O8 <sup>i</sup> -Zn2-N4  | 91.59(9)   |
| Zn2-O8 <sup>i</sup>  | 2.545(2)  | O9-Zn3-O10               | 58.35(8)   |
| Zn3-O9               | 2.374(2)  | O9-Zn3-O11               | 153.11(8)  |
| Zn3-O10              | 2.105(2)  | O9-Zn3-O12               | 92.18(9)   |
| Zn3-O11              | 2.021(2)  | O9-Zn3-N5                | 92.77(9)   |
| Zn3-O12              | 2.015(2)  | O9-Zn3-N6 <sup>ii</sup>  | 83.61(9)   |
| Zn3-N5               | 2.133(3)  | O10-Zn3-O11              | 94.84(9)   |
| Zn3-N6 <sup>ii</sup> | 2.182(3)  | O10-Zn3-O12              | 149.90(9)  |
| Zn4-O13              | 2.024(2)  | O10-Zn3-N5               | 93.92(9)   |
| Zn4-O14              | 2.072(2)  | O10-Zn3-N6 <sup>ii</sup> | 85.86(9)   |
| Zn4-O15              | 2.365(2)  | O11-Zn3-O12              | 114.16(9)  |
| Zn4-O16              | 2.133(2)  | O11-Zn3-N5               | 90.99(9)   |
| Zn4-N7               | 2.143(3)  | O11-Zn3-N6 <sup>ii</sup> | 93.13(9)   |
| Zn4-N8               | 2.140(3)  | O12-Zn3-N5               | 93.48(9)   |
| O1-Zn1-O2            | 58.36(8)  | O12-Zn3-N6 <sup>ii</sup> | 84.72(9)   |
| O1-Zn1-O3            | 87.43(8)  | N5-Zn3-N6 <sup>ii</sup>  | 175.88(9)  |
| O1-Zn1-O4            | 148.81(8) | O13-Zn4-O14              | 115.03(9)  |
| O1-Zn1-N1            | 94.64(9)  | O13-Zn4-O15              | 150.30(8)  |
| O1-Zn1-N2            | 82.49(9)  | O13-Zn4-O16              | 92.44(8)   |
| O2-Zn1-O3            | 145.79(9) | O13-Zn4-N7               | 95.34(9)   |
| O2-Zn1-O4            | 91.77(9)  | O13-Zn4-N8               | 92.48(9)   |
| O2-Zn1-N1            | 93.63(9)  | O14-Zn4-O15              | 94.09(8)   |
| O2-Zn1-N2            | 87.70(9)  | O14-Zn4-O16              | 152.05(9)  |
| O3-Zn1-O4            | 121.96(9) | O14-Zn4-N7               | 89.23(9)   |
| O3-Zn1-N1            | 88.54(9)  | O14-Zn4-N8               | 85.04(9)   |
| O5-Zn2-N3            | 88.84(9)  | O15-Zn4-O16              | 58.10(8)   |
| O5-Zn2-N4            | 94.37(9)  | O15-Zn4-N7               | 90.55(9)   |
| O3-Zn1-N2            | 88.02(9)  | O15-Zn4-N8               | 83.93(9)   |
| O4-Zn1-N1            | 96.18(9)  | O16-Zn4-N7               | 93.47(9)   |
| O4-Zn1-N2            | 87.96(9)  | O16-Zn4-N8               | 88.85(9)   |
| N1-Zn1-N2            | 175.61(9) | N7-Zn4-N8                | 171.74(8)  |
| O5-Zn2-O6            | 123.16(9) |                          |            |
| O5-Zn2-O7            | 98.50(9)  |                          |            |

Symmetry codes: (i) x, -1+y, z; (ii) x, 1+y, -1+z

**Table S5.** Hydrogen bonding interactions ( $\text{\AA}$ ,  $^\circ$ ) in compound **1**

| D–H $\cdots$ A                     | H $\cdots$ A | D $\cdots$ A | D–H $\cdots$ A |
|------------------------------------|--------------|--------------|----------------|
| C13–H13 $\cdots$ O7                | 2.4700       | 3.175(9)     | 133.00         |
| C16–H16 $\cdots$ O8 <sup>i</sup>   | 2.5100       | 3.392(8)     | 159.00         |
| C18–H18 $\cdots$ O2w <sup>ii</sup> | 2.5500       | 3.332(13)    | 142.00         |
| C22–H22 $\cdots$ O8                | 2.3300       | 3.075(8)     | 137.00         |
| C23–H23 $\cdots$ O5 <sup>iii</sup> | 2.5800       | 3.248(8)     | 129.00         |
| C27–H27 $\cdots$ O6 <sup>i</sup>   | 2.3400       | 3.097(8)     | 139.00         |
| C28–H28 $\cdots$ O5                | 2.4600       | 3.175(8)     | 133.00         |
| C29–H29 $\cdots$ O2w <sup>iv</sup> | 2.4900       | 3.101(12)    | 123.00         |
| C31–H31 $\cdots$ O6 <sup>v</sup>   | 2.5300       | 3.416(7)     | 160.00         |
| C34–H34B $\cdots$ O2 <sup>v</sup>  | 2.5400       | 3.358(11)    | 143.00         |
| C39–H39B $\cdots$ O2w              | 2.1200       | 3.07(3)      | 170.00         |

Symmetry codes: (i)  $1/2+x, 1-y, z$ ; (ii)  $1/2-x, 1+y, 1/2+z$ ; (iii)  $-1+x, y, z$ ; (iv)  $1/2+x, -y, z$ ; (v)  $-1/2+x, 1-y, z$

**Fig. S1** Space-fill model of the 3D framework, **3**

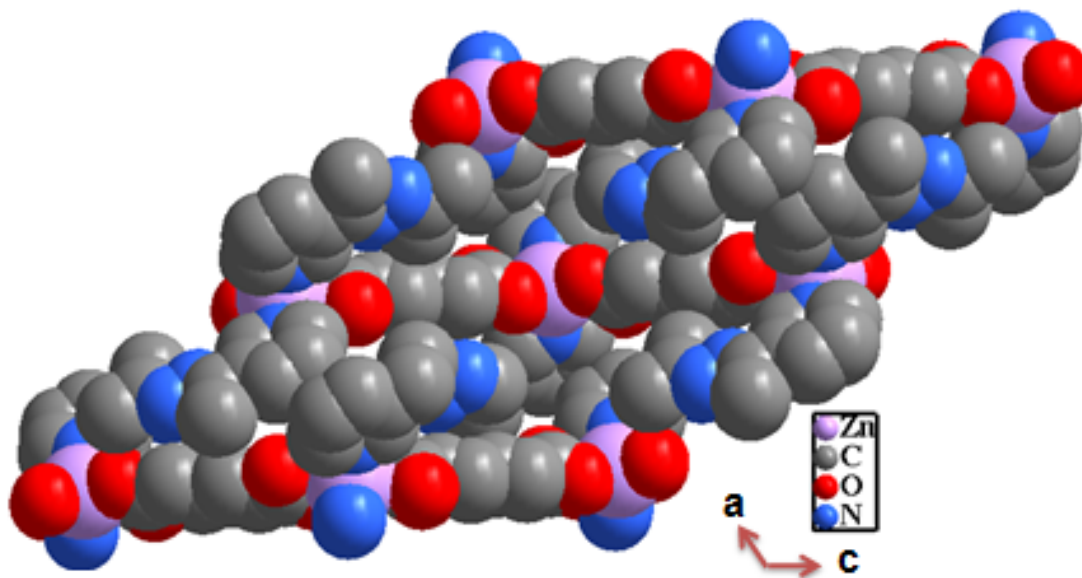

**Table S6.** Selected hydrogen bonding interactions ( $\text{\AA},^\circ$ ) in compound **2**

| D-H...A                      | H...A   | D...A    | D-H...A |
|------------------------------|---------|----------|---------|
| O1W-H1A...O2W                | 2.06(3) | 2.866(2) | 171(3)  |
| O1W - H1B...O2W <sup>i</sup> | 2.18(3) | 2.966(2) | 169(3)  |
| O2W - H2A...O2               | 1.84(3) | 2.706(2) | 171(3)  |
| O2W - H2B...O1W <sup>i</sup> | 2.08(3) | 2.873(2) | 159(2)  |

Symmetry code: (i)  $3/2-x, 1/2+y, 1/2-z$

**Fig. S2** View of the 3D framework in compound **4** showing the guest 4bpdh molecule inside the open channel involved in C-H...O and C-H...N hydrogen bonding interaction.

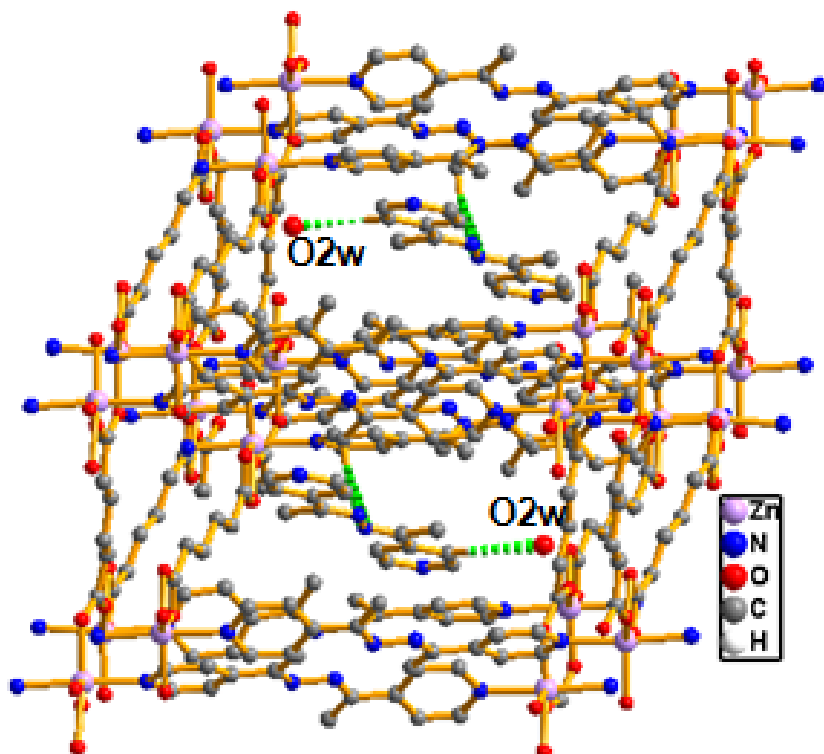

**Table S7.** Selected hydrogen bonding interactions ( $\text{\AA},^\circ$ ) in compound **4**

| D-H...A                        | H...A  | D...A    | D-H...A |
|--------------------------------|--------|----------|---------|
| C33 – H33C...N19 <sup>i</sup>  | 2.6000 | 3.495(6) | 156.00  |
| C45 – H45A...N12               | 2.3100 | 2.710(5) | 104.00  |
| C83 – H83 ...O1w <sup>ii</sup> | 2.4200 | 3.309(6) | 160.00  |
| C93 – H93 ... O2w              | 2.4700 | 3.320(6) | 152.00  |

Symmetry codes: (i) 1-x, 1-y, 2-z; (ii) 1-x, 2-y, 1-z.

**Fig. S3** TGA plot for the compounds **1-4**.

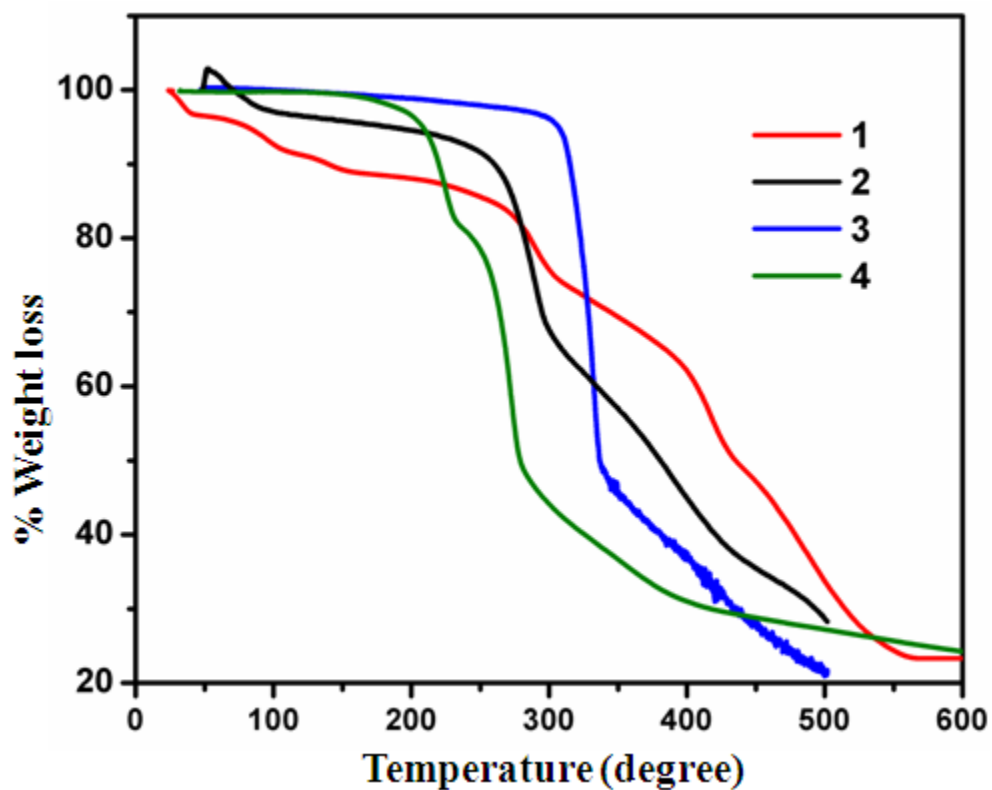

**Fig. S4** PXRD patterns of compound **1**. (a) Simulated (b) as-synthesized.

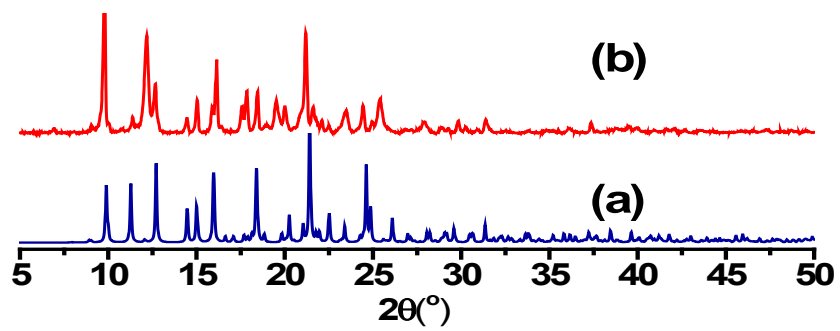

**Fig. S5** PXRD patterns of compound **2**. (a) Simulated (b) as-synthesized;

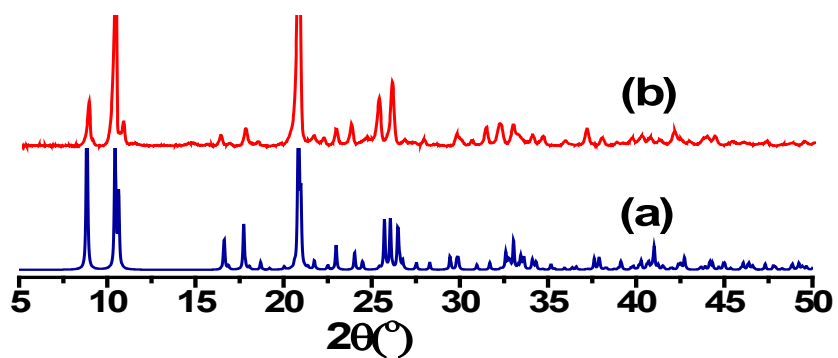

**Fig. S6** PXRD patterns of compound **3**. (a) Simulated (b) as-synthesized.

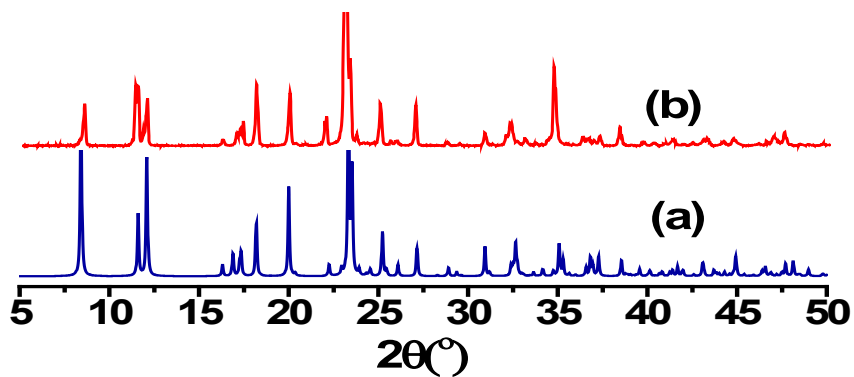



**Fig. S7** PXRD patterns of compound **4**. (a) Simulated (b) as-synthesized;

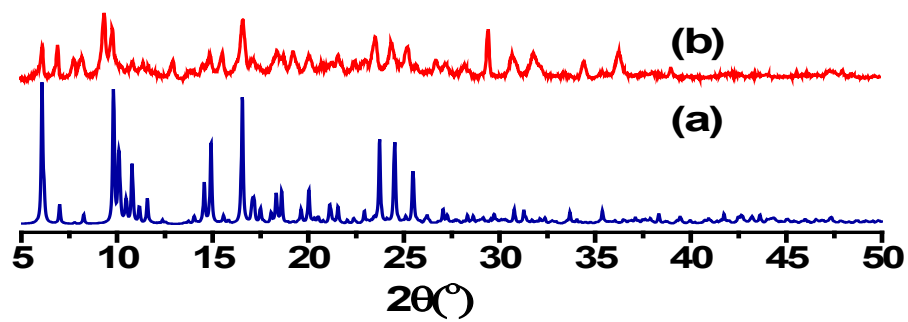

Supplement: c3ce42454e.pdf [file c3ce42454e.pdf]
